# Supplementary material
Source: MDPI journal article supplement (https://www.mdpi.com/2073-4395/12/10/2324)
Supplement: s1 [file s1]

**Supplementary Material for**

**Establishment of a QuEChERS-UPLC-MS/MS method for**

**simultaneously detecting tolfeprad and its metabolites in tea**

Zihan Wang<sup>1,#</sup>, Xinru Wang<sup>1,2,#</sup>, Min Wang<sup>1,3</sup>, Ziqiang Li<sup>1,4</sup>, Xinzong Zhang<sup>1,2</sup>, Li Zhou<sup>1,2</sup>,  
Hezhi Sun<sup>1,2</sup>, Mei Yang<sup>1,2</sup>, Zhengyun Lou<sup>1,2</sup>, Zongmao Chen<sup>1,2</sup>, Fengjian Luo<sup>1,2,\*</sup>

1 c, Hangzhou 310008, China

2 Key Laboratory of Biology, Genetics and Breeding of Special Economic Animals and Plants,  
Ministry of Agriculture and Rural Affairs, Hangzhou 310008, China

3 College of Horticulture and Landscape, Tianjin Agricultural University, Tianjin 300384, China

4 College of plant protection, Jilin Agricultural University, Jilin 130000, China

# Both Zihan Wang and Xinru Wang are co-first author.

\* Corresponding author

E-mail address: lfj@tricaas.com (Fengjian Luo);

Mei-Ling South Road, Hangzhou 310008

Fax: +86 571 86650331

Tel: +86 571 86650624

### **Captions:**

**Figure S1** The response of TFP and its metabolites under different cone voltages

**Figure S2** The response of parent and daughter ions of TFP and its metabolites under different collision energies

**Figure S3** The response of TFP and its metabolites in different mobile phases (A+B)

**Figure S4** The recoveries of TFP and its metabolites in different soaking solvents

**Figure S5** The recoveries of TFP and its metabolites under different types and quantities of purification adsorbents

**Figure S6** The samples after pretreatment (vial 1: green tea sample without purifying; vial 2: green tea sample with purifying by 50 mg C<sub>18</sub> + 50 mgMgSO<sub>4</sub>; vial 3:green tea sample with purifying by 50 mg C<sub>18</sub> + 50 mgMgSO<sub>4</sub> + 20 mg GCB + 20 mg C<sub>NT</sub>-OH;vial 4: green tea infusion sample without purifying.)

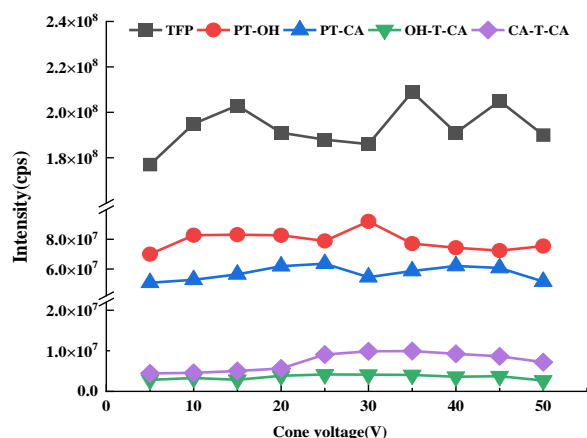

**Figure S1** The intensity of TFP and its metabolites under different cone voltages

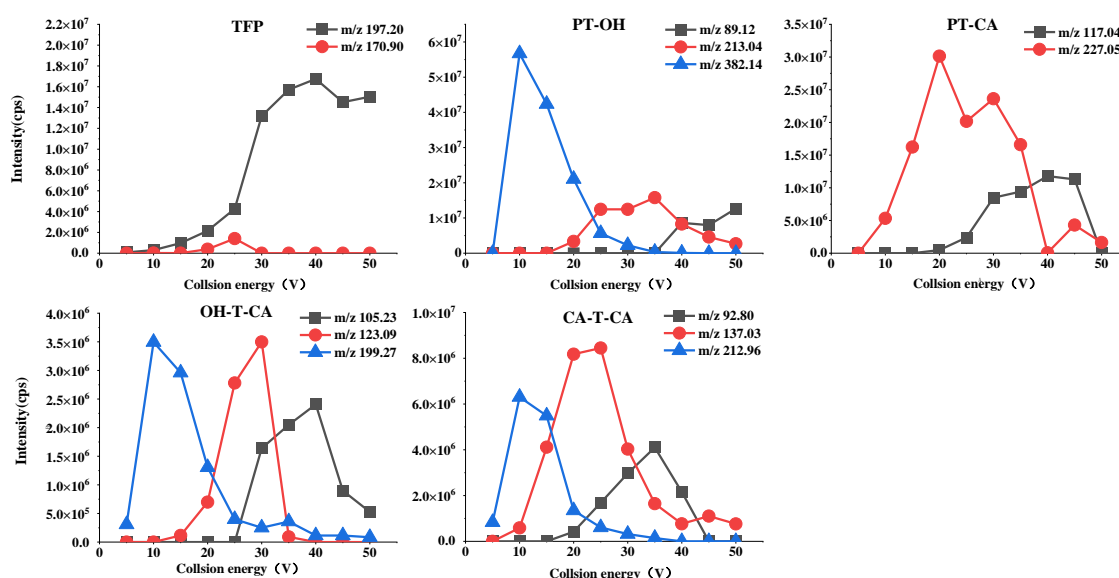

**Figure S2** The intensity of parent and daughter ions of TFP and its metabolites under different collision energies

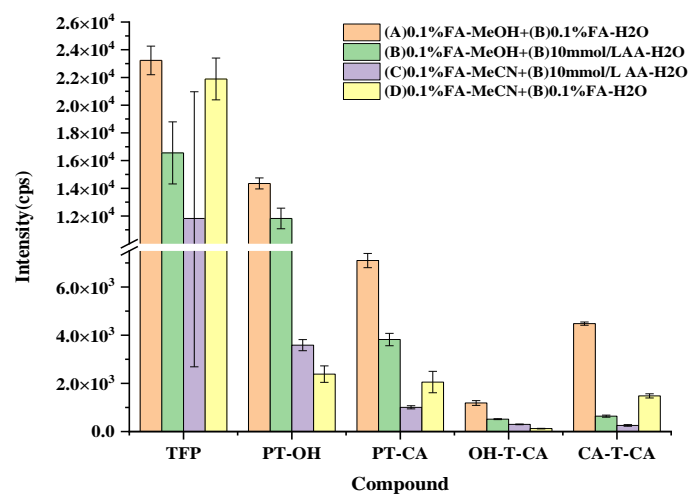

**Figure S3** The intensity of TFP and its metabolites in different mobile phases (A+B)

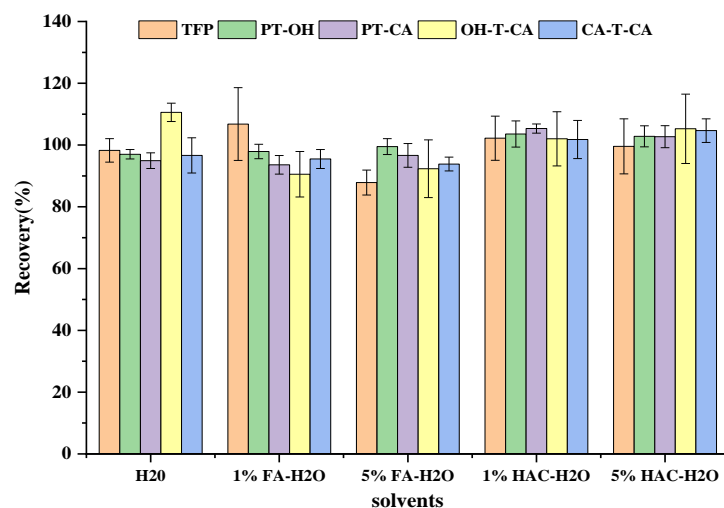

**Figure S4** The recoveries of TFP and its metabolites in different soaking solvents

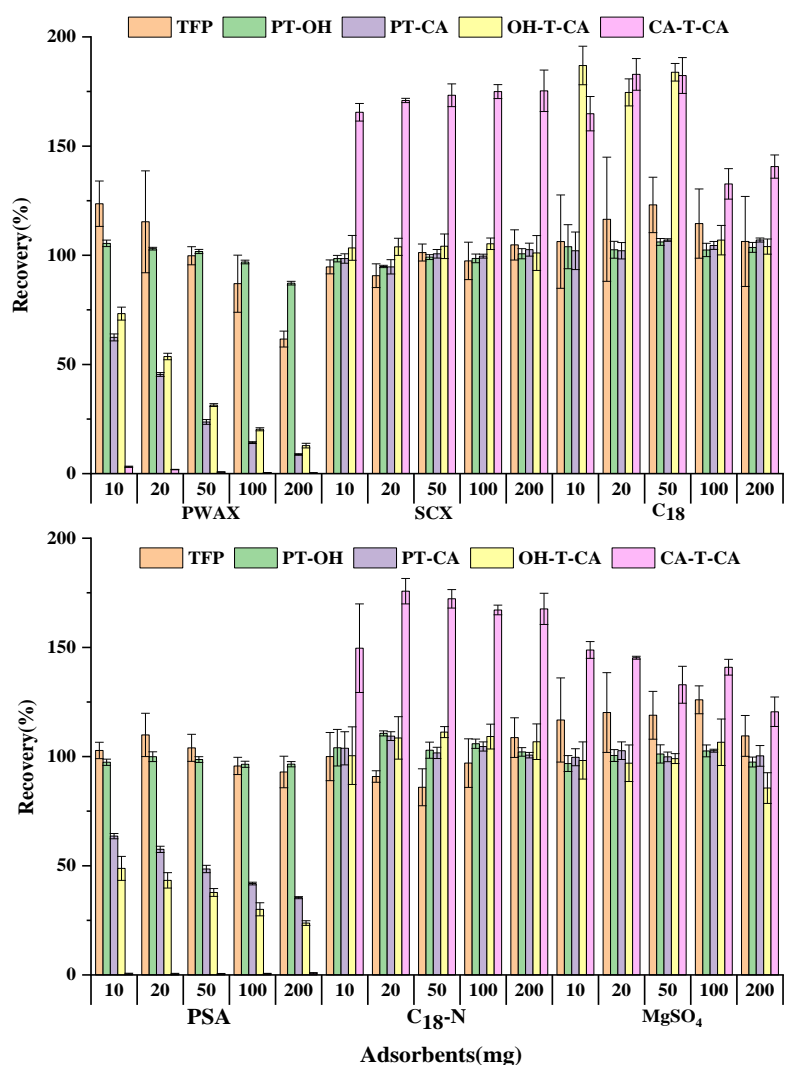

**Figure S5** The recoveries of TFP and its metabolites under different types and quantities of purification adsorbents

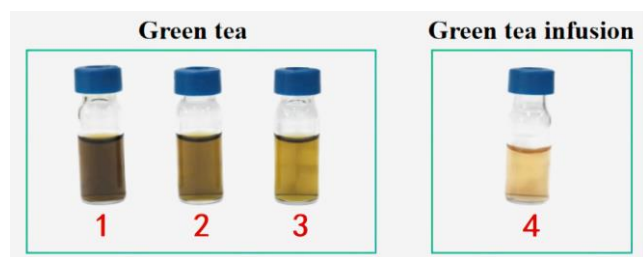

**Figure S6** The samples after pretreatment (vial 1: green tea sample without purifying; vial 2: green tea sample with purifying by 50 mg  $C_{18}$  + 50 mg  $MgSO_4$ ; vial 3: green tea sample with purifying by 50 mg  $C_{18}$  + 50 mg  $MgSO_4$  + 20 mg GCB + 20 mg  $C_{NT-OH}$ ; vial 4: green tea infusion sample without purifying.)
